# Supplementary material
Source: publisher site journal article supplement (https://www.dovepress.com/article/497558)
Supplement: Supplementary file 1 [file get_supplementary_file.php]

***Supplementary materials***

**Supplementary Figure 1** TGA curves of CeO2@IN NPs

**Supplementary Figure 2** H&E staining image of colon from colitis mice, which show high CT signals at 12 h post-administration of CeO2@IN NPs. Scale bars, 200 µm.

**Supplementary Figure 3** Representative CT images of mice in CeO2@IN NPs group at 12 h following oral administration during the whole treatment period

**Supplementary Figure 4** H&E stain of the major organs from C57BL/6 mice receiving CeO2@IN treatment at 14-days. Scales bars, 100 µm.

**Supplementary Figure 5** ICP-MS analysis of Ce contents in various organs (A) and feces (B) of C57BL/6 mice at 24h following oral administration of CeO2@IN NPs. Healthy C57BL/6 mice treated with PBS served as a control.

**Supplementary Figure 1.**


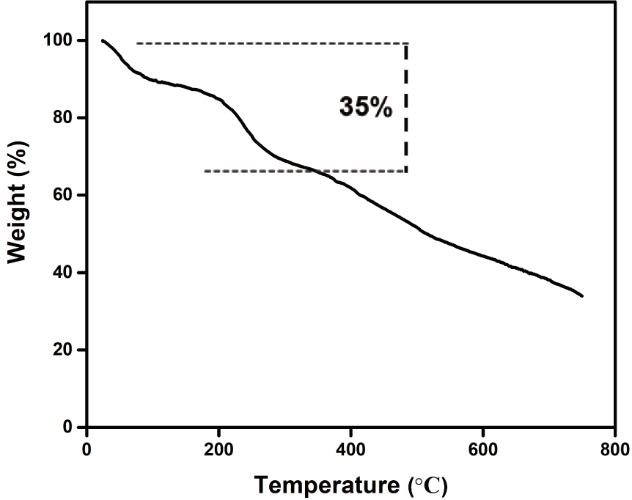


**Supplementary Figure 2.**


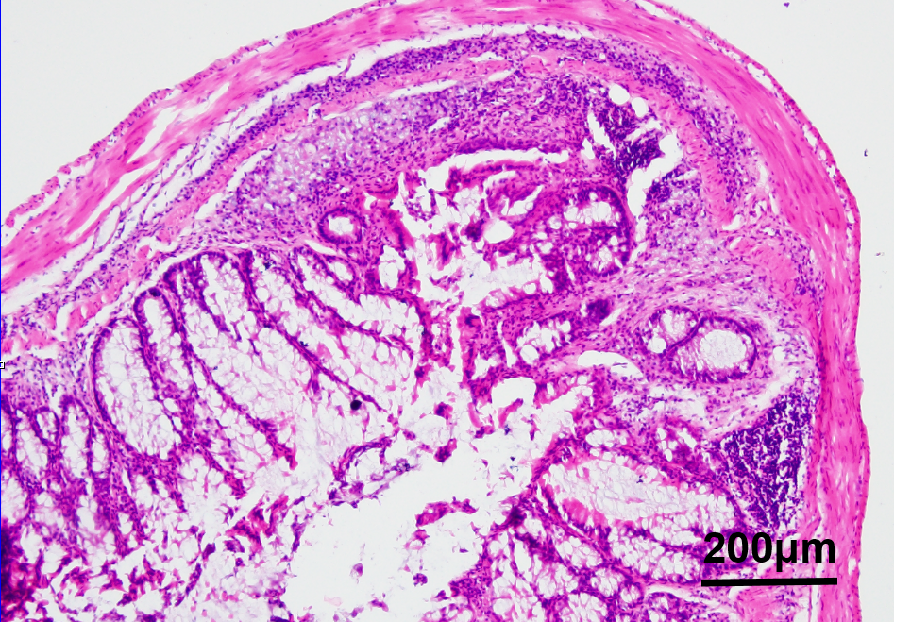


.

**Supplementary Figure 3.**


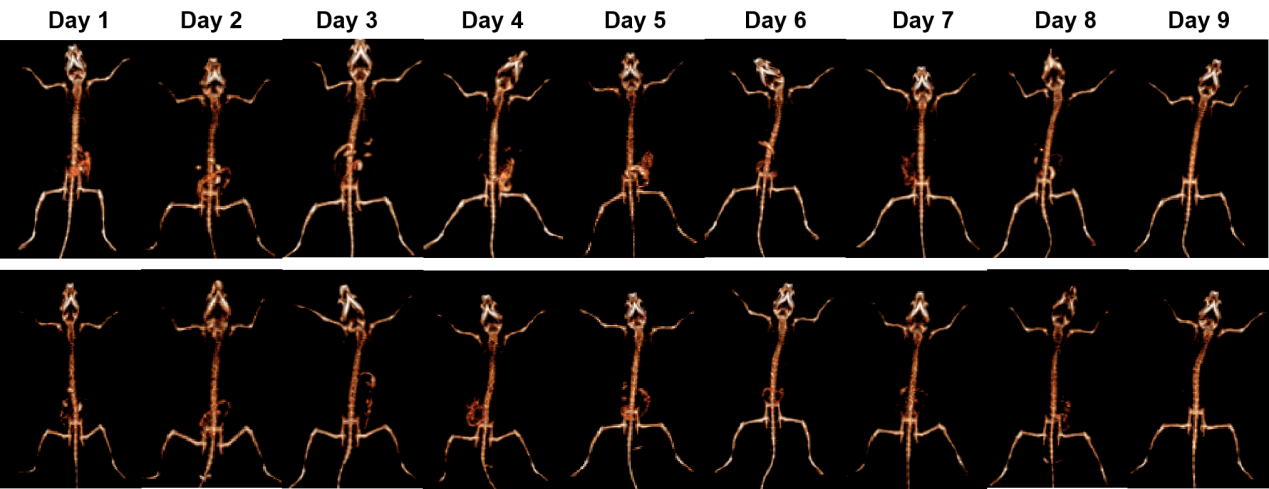


**Supplementary Figure 4.**

**
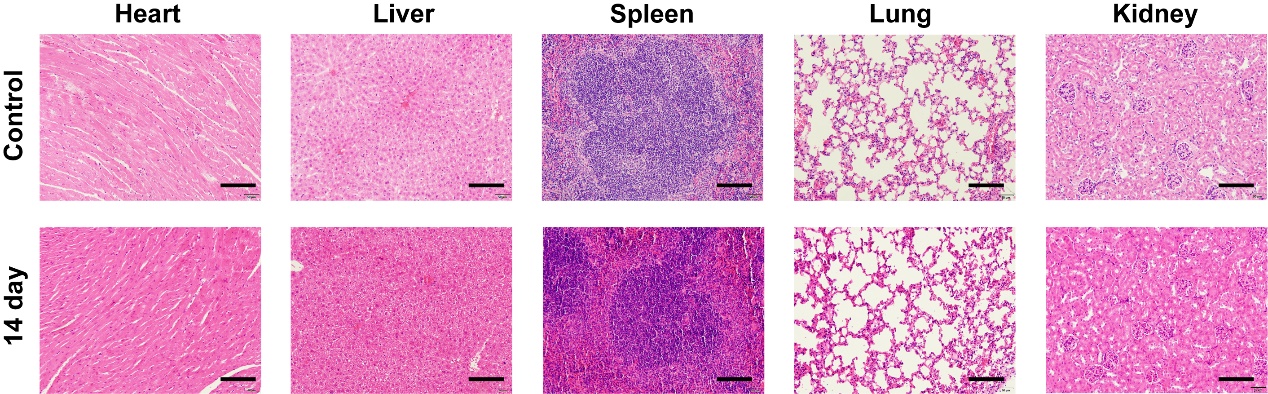
**

**Supplementary Figure 5.**

**
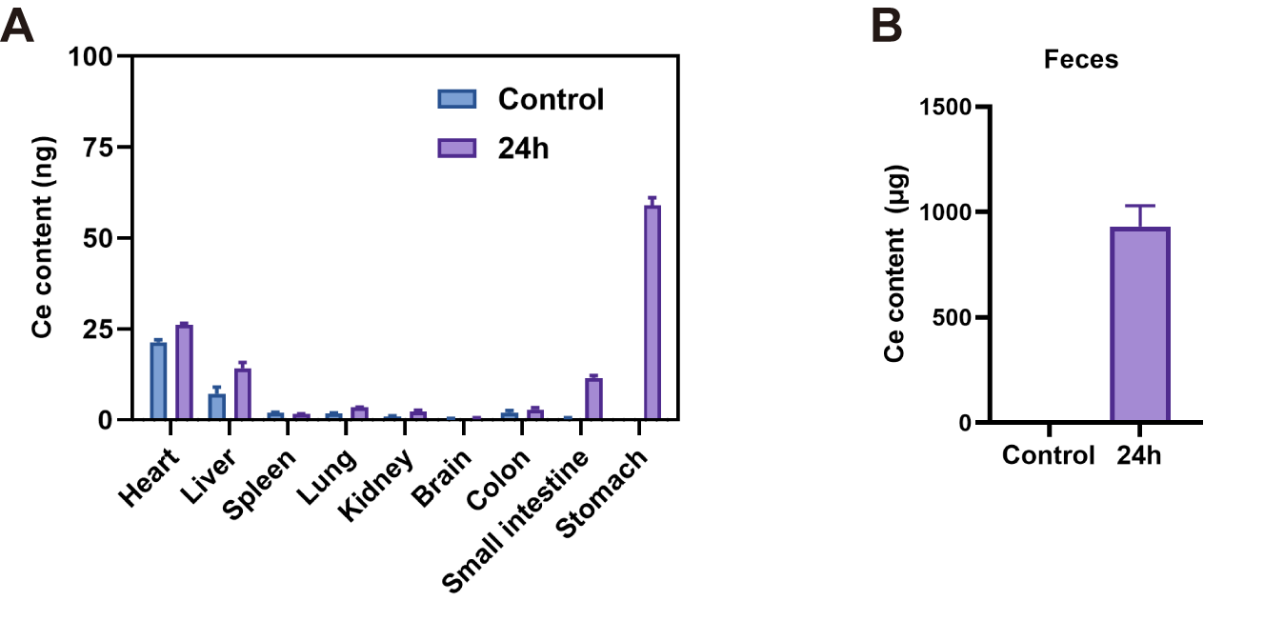
**
